# Supplementary material for: Application and implementation of brief geriatric assessment in primary care and community settings: a scoping review
Source: PubMed Central journal article supplement — BMC Geriatr. 2025 Jan 2;25:2. doi: 10.1186/s12877-024-05615-9 (PMC11697857; doi:10.1186/s12877-024-05615-9), 2025-01-02
Supplement: 12877_2024_5615_MOESM2_ESM.pdf [file 12877_2024_5615_MOESM2_ESM.pdf]

Additional File 2 Search strategy

| ID  | Search                                                                                                                        |
|-----|-------------------------------------------------------------------------------------------------------------------------------|
| #1  | MeSH descriptor: [Aged] explode all trees                                                                                     |
| #2  | (elder):ti,ab,kw OR (elders):ti,ab,kw OR (senior):ti,ab,kw OR (seniors):ti,ab,kw OR (older adult):ti,ab,kw                    |
| #3  | (older adults):ti,ab,kw OR (older person):ti,ab,kw OR (older persons):ti,ab,kw OR (older people):ti,ab,kw OR (aging):ti,ab,kw |
| #4  | (ageing):ti,ab,kw                                                                                                             |
| #5  | #1 OR #2 OR #3 OR #4                                                                                                          |
| #6  | MeSH descriptor: [Geriatric Assessment] explode all trees                                                                     |
| #7  | (geriatric assessment):ti,ab,kw                                                                                               |
| #8  | #6 OR #7                                                                                                                      |
| #9  | (modified):ti,ab,kw OR (brief):ti,ab,kw OR (rapid):ti,ab,kw OR (short):ti,ab,kw OR (abbreviated):ti,ab,kw                     |
| #10 | (simplified):ti,ab,kw OR (mini):ti,ab,kw                                                                                      |
| #11 | #9 OR #10                                                                                                                     |
| #12 | MeSH descriptor: [Health Services for the Aged] explode all trees                                                             |
| #13 | MeSH descriptor: [Primary Health Care] explode all trees                                                                      |
| #14 | MeSH descriptor: [Community Health Services] explode all trees                                                                |
| #15 | (community):ti,ab,kw OR (primary care):ti,ab,kw                                                                               |
| #16 | #12 OR #13 OR #14 OR #15                                                                                                      |
| #17 | #5 AND #8 AND #11 AND #16                                                                                                     |
